# Supplementary material
Source: publisher figshare collection journal article supplement (https://karger.figshare.com/ndownloader/files/22878584)
Supplement: Supplementary file 1 [file 22878584]

# Online Supplemental data

**Supplemental Table E.1 – Lymph node characteristics.**

| **Mediastinal lymph node region:** Number of measurements / Percentage |
| --- |
| **2 L**: 4 / 0.8% **2 R**: 13 / 2.5% |
| **4 Leb**: 65 / 12.4% **4 L Eso**: 8 / 1.5% **4 R**: 125 / 23.8% |
| **7 LMB**: 17 / 3.2% **7 Eso**: 23 / 4.4% **7 RMB**: 126 / 24% |
| **10 L**: 5 / 1% **10 R**: 7 / 1.3% |
| **11 L**: 57 / 10.9% **11 R**: 59 / 11.2% |
| **12 L**: 3 / 0.6% **12 R**: 7 / 1.3% |
| **Mediastinal pulmonary mass**: 2 / 0.4% | **3 P**: 2 / 0.4% | **8 R**: 2 / 0.4% |

**Supplemental Table E.1 – Lymph node characteristics.** Lymph node regions according to the IASLC nodal definition from the 8th TNM classification as included in this multi-center trial, followed by counts and percentages [14]. Two counts of mediastinal pulmonary masses can furthermore be found, interpreted as continuous with a previous lymph node margin, but now indistinguishable. *Abbreviations: L – Left, R – Right, Leb – Left endobronchial, Eso – esophageal, LMB – Left main bronchus, RMB – Right main bronchus, P – Posterior.*
